# Supplementary material for: Antibiotic effect and microbiome persistence vary along the European seabass gut
Source: PubMed Central journal article supplement (PMC7305304; doi:10.1038/s41598-020-66622-5), 2020-06-19
Supplement: 41598_2020_66622_MOESM1_ESM.pdf [file 41598_2020_66622_MOESM1_ESM.pdf]

Supplementary Information

**Antibiotic effect and microbiome persistence vary along the  
European seabass gut**

**Fotini Kokou<sup>1,2,3\*</sup>, Goor Sasson<sup>2</sup>, Itzhak Mizrahi<sup>2</sup>, Avner Cnaani<sup>1\*</sup>**

<sup>1</sup>Department of Poultry and Aquaculture, Institute of Animal Sciences, Agricultural Research Organization, Rishon Letziyon, Israel

<sup>2</sup>Department of Life Sciences & the National Institute for Biotechnology in the Negev, Ben-Gurion University of the Negev, Beer-Sheva 84105, Israel

<sup>3</sup>Wageningen University and Research, Department of Animal Sciences, Aquaculture and Fisheries Group, Wageningen, Netherlands

\*Corresponding authors: Fotini Kokou, fotini.kokou@wur.nl, Wageningen University and Research, Aquaculture and Fisheries Group, Netherlands; Avner Cnaani, avnerc@agri.gov.il, Department of Poultry and Aquaculture, Agricultural Research Organization, Israel

<sup>3</sup>*Present address*

## Supplementary Tables

**Supplementary Table 1** | Good's coverage across the samples.

---

|            |               |       |
|------------|---------------|-------|
| Control    | Pyloric caeca | 0.999 |
|            | Midgut        | 1.000 |
|            | Hindgut       | 0.999 |
| Mix 1 Low  | Pyloric caeca | 0.999 |
|            | Midgut        | 1.000 |
|            | Hindgut       | 0.999 |
| Mix 1 High | Pyloric caeca | 0.999 |
|            | Midgut        | 0.999 |
|            | Hindgut       | 0.999 |
| Mix 2 Low  | Pyloric caeca | 0.999 |
|            | Midgut        | 0.999 |
|            | Hindgut       | 0.999 |
| Mix 2 High | Pyloric caeca | 0.999 |
|            | Midgut        | 0.999 |
|            | Hindgut       | 0.999 |

---

**Supplementary Table 2** | Permanova results for experimental communities based on Bray–Curtis distances.

|                            | <b>d.f.</b> | <b>SS</b> | <b>MS</b> | <b>PseudoF</b> | <b>P-value</b> |
|----------------------------|-------------|-----------|-----------|----------------|----------------|
| <i>Dosage</i>              | 2           | 0.18297   | 0.182970  | 5.8113         | 0.002**        |
| <i>Part</i>                | 2           | 0.14322   | 0.071612  | 2.2745         | 0.006**        |
| <i>Antibiotic x Dosage</i> | 4           | 0.11916   | 0.059580  | 1.8923         | 0.077          |
| <i>Residuals</i>           | 79          | 2.58177   | 0.031485  |                |                |
| <i>Total</i>               | 87          | 3.02712   |           |                |                |

\*, \*\*Statistical significance at  $P < 0.05$  and  $0.01$ , respectively. Permutations  $n = 999$ .

d.f., degrees of freedom; SS, sum of squares; MS, mean sum of squares.

**Supplementary Table 3** | Bacterial genome NCBI IDs used for functional analysis in RAST and percentage similarity with the persistent microbes.

| <b>ESV ID – taxonomy</b>          | <b>Closest bacterial species</b>               | <b>% Similarity</b> |
|-----------------------------------|------------------------------------------------|---------------------|
| <i>Pseudomonas veronii</i>        | <i>Pseudomonas veronii</i> R02                 | 100                 |
| <i>Janthinobacterium lividum</i>  | <i>Janthinobacterium lividum</i> PAMC 25724    | 100                 |
| <i>Acinetobacter</i> sp.          | <i>Acinetobacter junii</i> strain 65           | 100                 |
| <i>Pseudomonas fragi</i>          | <i>Pseudomonas fragi</i> NBRC 3458             | 100                 |
| <i>Stenotrophomonas</i> sp.       | <i>Stenotrophomonas maltophilia</i> ATCC 13637 | 99.2                |
| <i>Comamonadaceae</i> unknown sp. | <i>Limnohabitans planktonicus</i> II-D5        | 99.6                |
| <i>Aeromonadaceae</i> sp.         | <i>Aeromonas hydrophila</i> ATCC 7966          | 100                 |

**Supplementary Table 4** | Bacterial taxa that were significantly depleted from antibiotic intake and the genome of their closest relatives used for functional analysis in RAST.

| <b>ESV taxonomy</b>                             | <b>Closest bacterial species</b>                | <b>% Similarity</b> | <b>Affected Mixture</b> |
|-------------------------------------------------|-------------------------------------------------|---------------------|-------------------------|
| <i>Ruminococcaceae</i>                          | <i>Anaerotruncus rubiinfantis</i><br>M15        | 100                 | Mix 1 and 2             |
| <i>Porphyromonas endodontalis</i>               | <i>Porphyromonas endodontalis</i><br>ATCC 35406 | 96.5                | Mix 1 and 2, High       |
| <i>Paraprevotellaceae</i><br><i>unknown sp.</i> | <i>Prevotella buccae</i> ATCC<br>33574          | 84.5                | Mix 1 and 2, High       |
| <i>Prevotella sp.</i>                           | <i>Prevotella ruminicola</i> 23                 | 96.0                | Mix 1 and 2             |
| <i>Coprobacillus sp</i>                         | <i>Coprobacillus cateniformis</i><br>JCM10604   | 91.0                | Mix 1 and 2, High       |
| <i>Plesiomonas shigelloides</i>                 | <i>Plesiomonas shigelloides</i><br>302-73       | 100                 | Mix 1 and 2, High       |

**Supplementary Table 5** | Nearest Sequenced Taxon Index (NSTI) of each sample, showing how closely related are the microorganisms within each sample to the reference genomes used for the predictions. The lowest the score is (<0.06) the better the prediction. The average score was 0.04 in our dataset. M1\_5: Mix 1 low; M1\_30: Mix 1 High; M2\_5: Mix 2 Low; M2\_30: Mix 2 High

| Sample | Part          | Treatment | Value    |
|--------|---------------|-----------|----------|
| 80     | Pyloric caeca | Control   | 0.040301 |
| 81     | Pyloric caeca | M1_5      | 0.039983 |
| 82     | Pyloric caeca | M1_30     | 0.040518 |
| 83     | Pyloric caeca | M2_5      | 0.042462 |
| 84     | Pyloric caeca | M2_30     | 0.042129 |
| 85     | Pyloric caeca | Control   | 0.041038 |
| 86     | Pyloric caeca | M1_5      | 0.041782 |
| 87     | Pyloric caeca | M1_30     | 0.039677 |
| 88     | Pyloric caeca | M2_5      | 0.053526 |
| 89     | Pyloric caeca | M2_30     | 0.038751 |
| 90     | Pyloric caeca | Control   | 0.046132 |
| 91     | Pyloric caeca | M1_5      | 0.040109 |
| 92     | Pyloric caeca | M1_30     | 0.040561 |
| 93     | Pyloric caeca | M2_5      | 0.040232 |
| 94     | Pyloric caeca | M2_30     | 0.038446 |
| 95     | Pyloric caeca | Control   | 0.040233 |
| 96     | Pyloric caeca | M1_5      | 0.042979 |
| 97     | Pyloric caeca | M1_30     | 0.03969  |
| 98     | Pyloric caeca | M2_5      | 0.040477 |
| 99     | Pyloric caeca | M2_30     | 0.040316 |
| 100    | Pyloric caeca | Control   | 0.045549 |
| 101    | Pyloric caeca | M1_5      | 0.045183 |
| 102    | Pyloric caeca | M1_30     | 0.039226 |
| 103    | Pyloric caeca | M2_5      | 0.040444 |
| 104    | Pyloric caeca | M2_30     | 0.041658 |
| 105    | Pyloric caeca | Control   | 0.041008 |
| 106    | Pyloric caeca | M1_5      | 0.041397 |
| 107    | Pyloric caeca | M1_30     | 0.050427 |
| 108    | Pyloric caeca | M2_5      | 0.040037 |
| 109    | Pyloric caeca | M2_30     | 0.041078 |
| 113    | Midgut        | Control   | 0.068398 |
| 114    | Midgut        | M1_5      | 0.039437 |
| 115    | Midgut        | M1_30     | 0.037848 |
| 116    | Midgut        | M2_5      | 0.048983 |
| 117    | Midgut        | M2_30     | 0.042021 |
| 118    | Midgut        | Control   | 0.047204 |
| 119    | Midgut        | M1_5      | 0.0419   |
| 120    | Midgut        | M1_30     | 0.046077 |
| 121    | Midgut        | M2_5      | 0.042896 |
| 122    | Midgut        | M2_30     | 0.042169 |
| 123    | Midgut        | Control   | 0.042203 |
| 124    | Midgut        | M1_5      | 0.040757 |
| 125    | Midgut        | M1_30     | 0.043899 |
| 126    | Midgut        | M2_5      | 0.041387 |

|     |         |         |          |
|-----|---------|---------|----------|
| 127 | Midgut  | M2_30   | 0.052143 |
| 128 | Midgut  | Control | 0.047428 |
| 129 | Midgut  | M1_5    | 0.040418 |
| 130 | Midgut  | M1_30   | 0.051807 |
| 131 | Midgut  | M2_5    | 0.044146 |
| 132 | Midgut  | M2_30   | 0.044112 |
| 133 | Midgut  | Control | 0.066961 |
| 134 | Midgut  | M1_5    | 0.039683 |
| 135 | Midgut  | M1_30   | 0.043541 |
| 136 | Midgut  | M2_5    | 0.041179 |
| 137 | Midgut  | M2_30   | 0.041131 |
| 138 | Midgut  | Control | 0.048562 |
| 139 | Midgut  | M1_5    | 0.064558 |
| 140 | Midgut  | M1_30   | 0.041449 |
| 141 | Midgut  | M2_5    | 0.06749  |
| 142 | Midgut  | M2_30   | 0.052817 |
| 146 | Hindgut | Control | 0.039717 |
| 147 | Hindgut | M1_5    | 0.038614 |
| 148 | Hindgut | M1_30   | 0.039756 |
| 149 | Hindgut | M2_5    | 0.040347 |
| 150 | Hindgut | M2_30   | 0.038893 |
| 151 | Hindgut | Control | 0.039647 |
| 152 | Hindgut | M1_5    | 0.051041 |
| 153 | Hindgut | M1_30   | 0.039381 |
| 154 | Hindgut | M2_5    | 0.039325 |
| 155 | Hindgut | M2_30   | 0.040038 |
| 156 | Hindgut | Control | 0.042584 |
| 157 | Hindgut | M1_5    | 0.04442  |
| 158 | Hindgut | M1_30   | 0.041562 |
| 159 | Hindgut | M2_5    | 0.041194 |
| 160 | Hindgut | M2_30   | 0.041106 |
| 161 | Hindgut | Control | 0.039933 |
| 162 | Hindgut | M1_5    | 0.039672 |
| 163 | Hindgut | M1_30   | 0.039403 |
| 164 | Hindgut | M2_30   | 0.041218 |
| 165 | Hindgut | Control | 0.089766 |
| 166 | Hindgut | M1_5    | 0.04303  |
| 167 | Hindgut | M1_30   | 0.040243 |
| 168 | Hindgut | M2_5    | 0.039672 |
| 169 | Hindgut | M2_30   | 0.039723 |
| 170 | Hindgut | M1_5    | 0.039867 |
| 171 | Hindgut | M1_30   | 0.045891 |
| 172 | Hindgut | M2_5    | 0.044051 |
| 173 | Hindgut | M2_30   | 0.04134  |

---

## Supplementary Figures

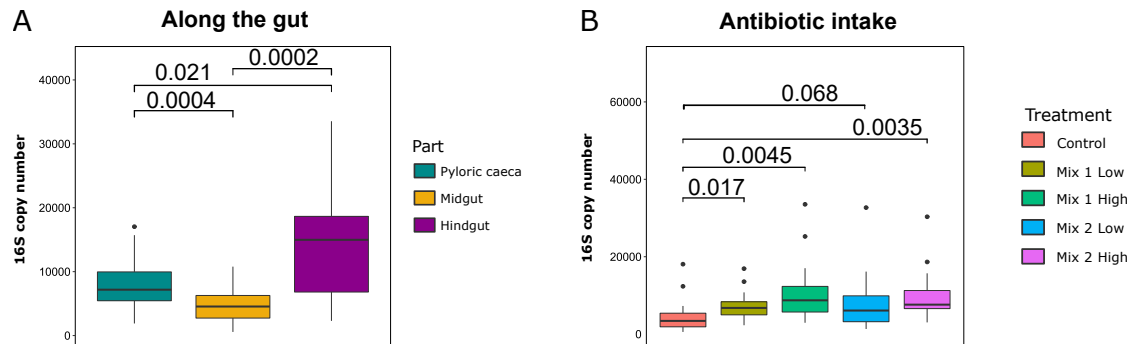

**Supplementary Figure 1.** Number of 16S rRNA gene copy numbers measured with quantitative PCR. **A.** In the different gut compartments, pyloric caeca, midgut and hindgut. **B.** In the antibiotic-treated groups and the control. Significance was tested with Wilcoxon rank-sum two-sided test at  $P < 0.05$ .



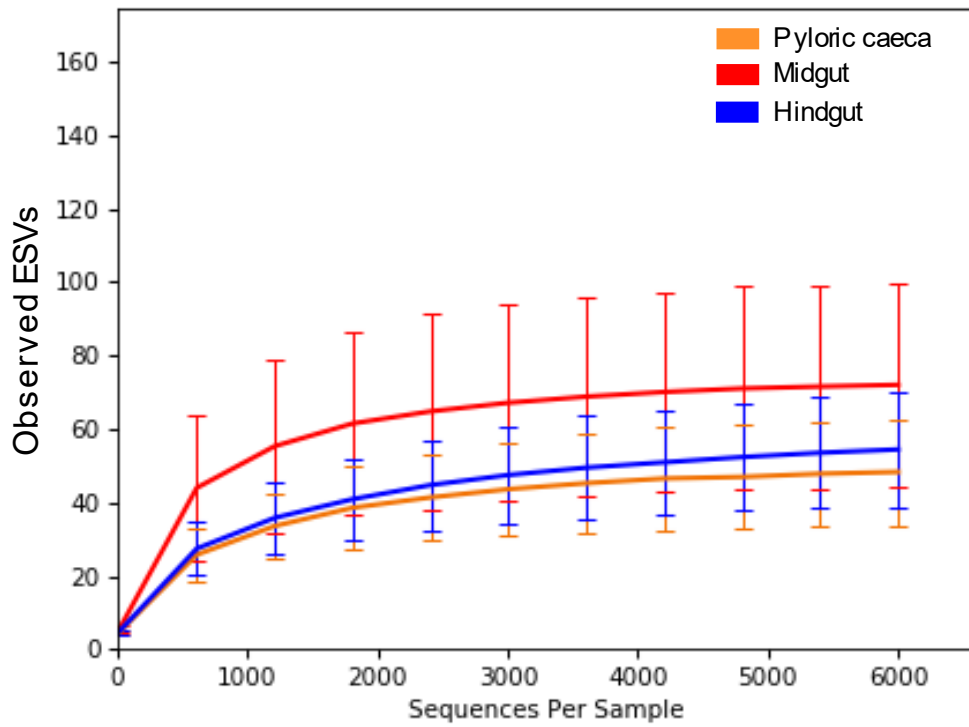

**Supplementary Figure 2.** Rarefaction curves per sequence depth in the different gut parts.

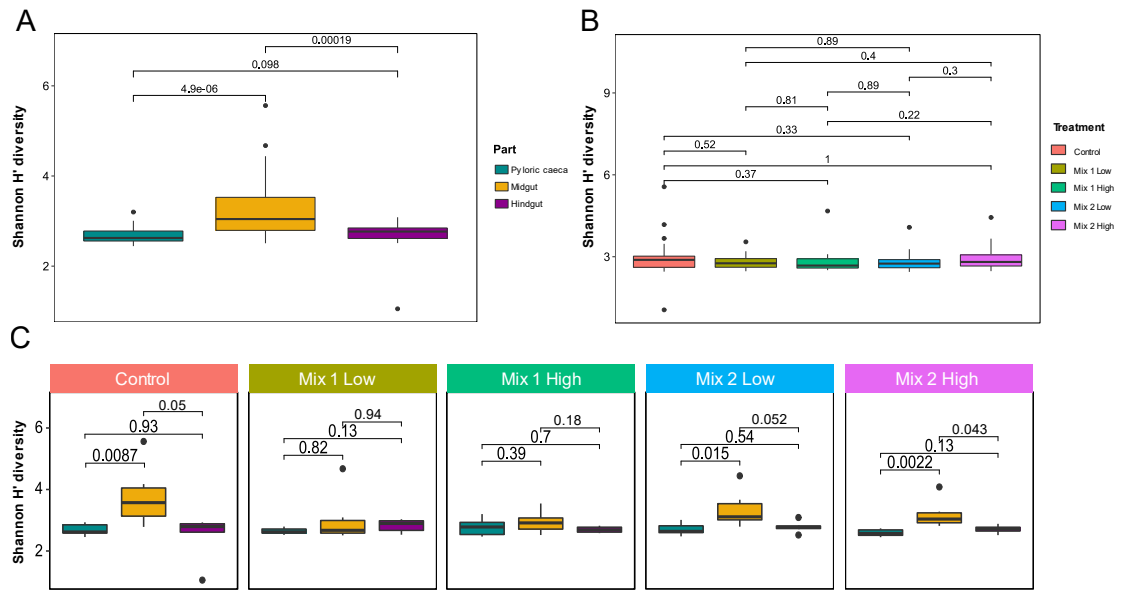

**Supplementary Figure 3.** Shannon H' diversity of the microbial communities, **A.** within each gut part, **B.** across antibiotic-treated groups and control, **C.** across gut parts within each antibiotic-treated group and control. Significance was tested with Wilcoxon rank-sum two-way test at  $P < 0.05$ .

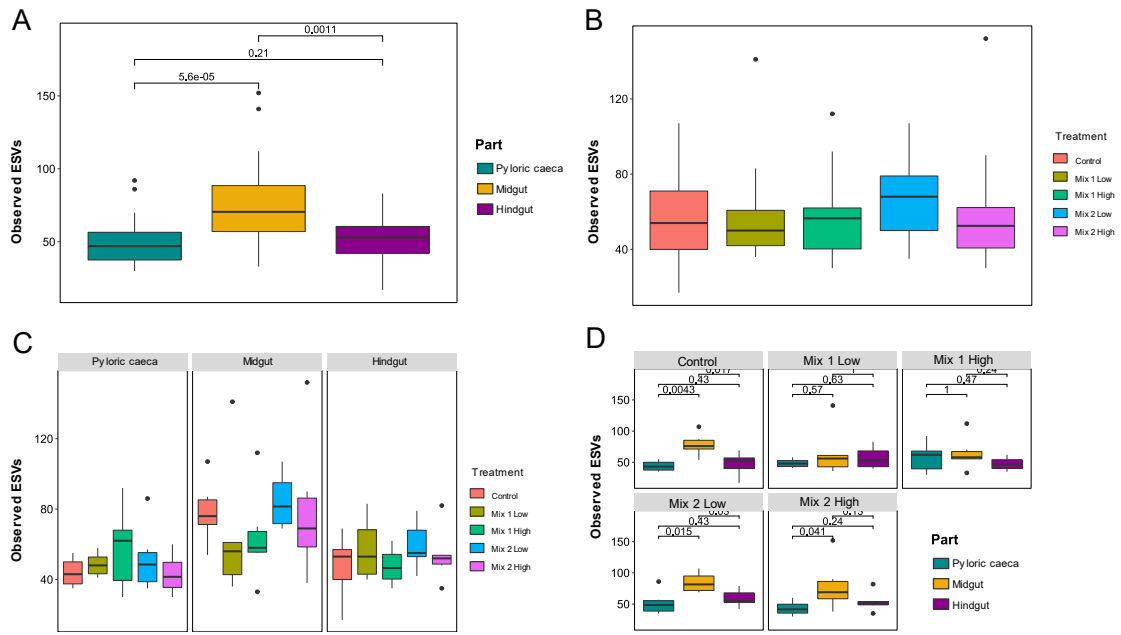

**Supplementary Figure 4.** Richness of the microbial communities **A.** within each gut part, **B.** across antibiotic treatment, **C.** within each gut across antibiotic-treated groups and control, and **D.** across gut parts within each antibiotic-treated group and control. Significance was tested with Wilcoxon rank-sum two-way test at  $P < 0.05$ .

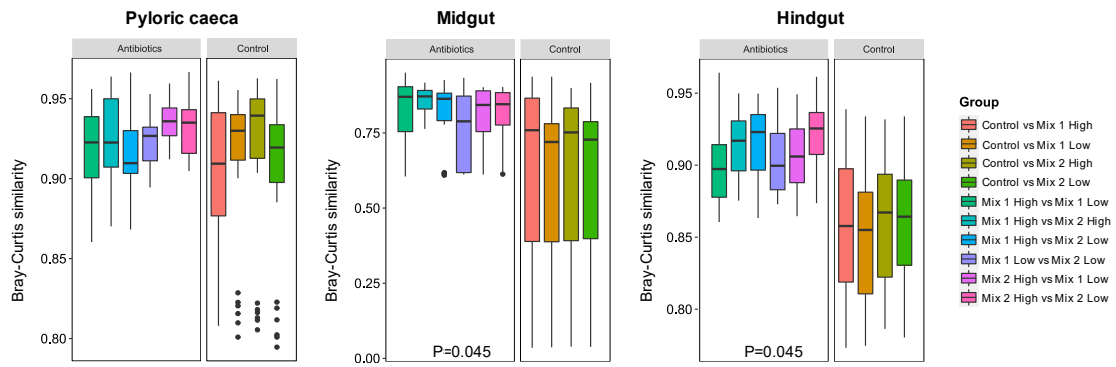

**Supplementary Figure 5.** Between-group similarity of control and antibiotic-treated groups, showing slightly significant lower similarity between the treated and control groups using Bray-Curtis metric in the midgut and hindgut. P-values indicate the difference between control to antibiotics (right) vs. between antibiotics comparisons (left).

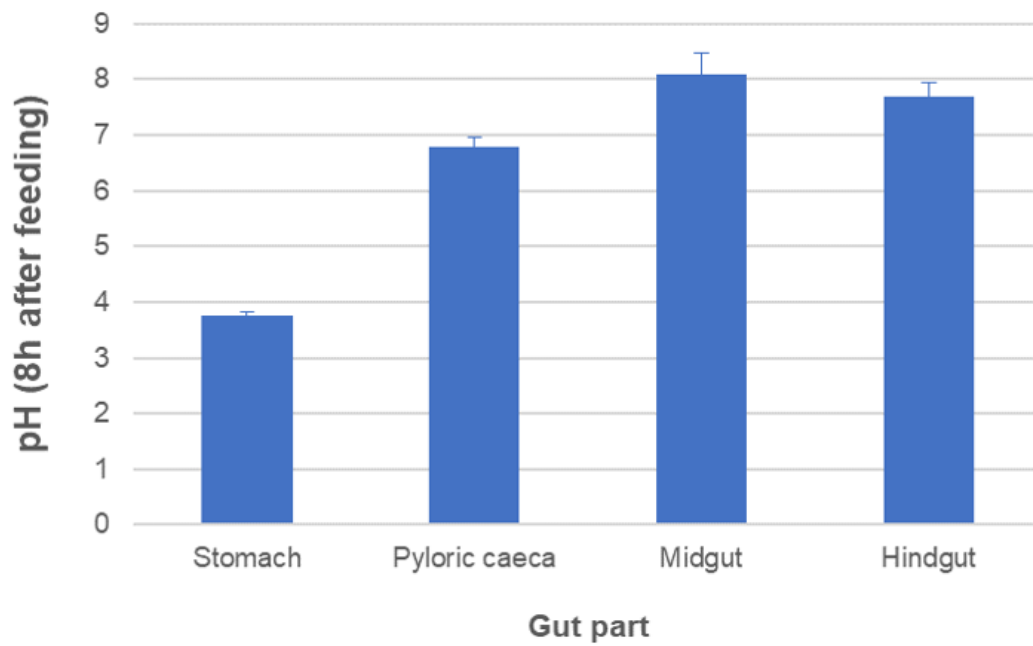

**Supplementary Figure 6.** Mean values of pH in the different gut parts 8h after feeding. Measurements obtained from Nikolopoulou et al. (2011) and our measurements in the group in seabass individuals (n=5), using a micro-pH meter. (Data obtained from Kokou et al., 2019).

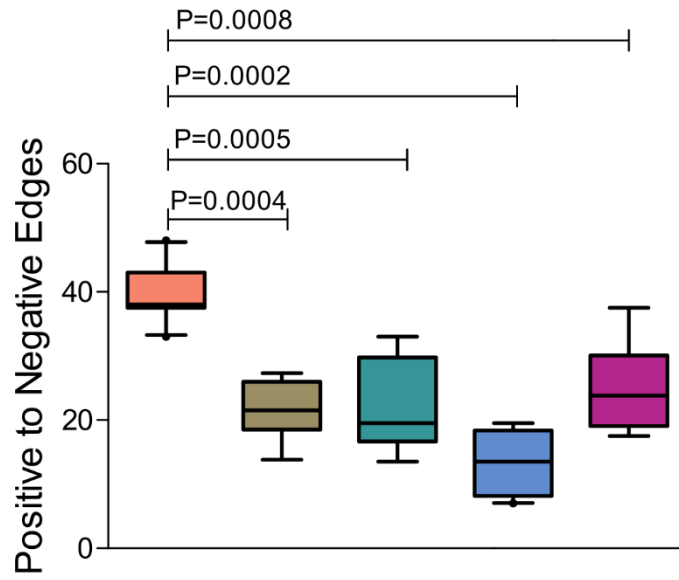

**Supplementary Figure 7.** Network analysis using Spiec Easi, showing the positive to negative edges ratio. Significance was tested with Wilcoxon rank-sum two-way test at level  $P < 0.05$ .

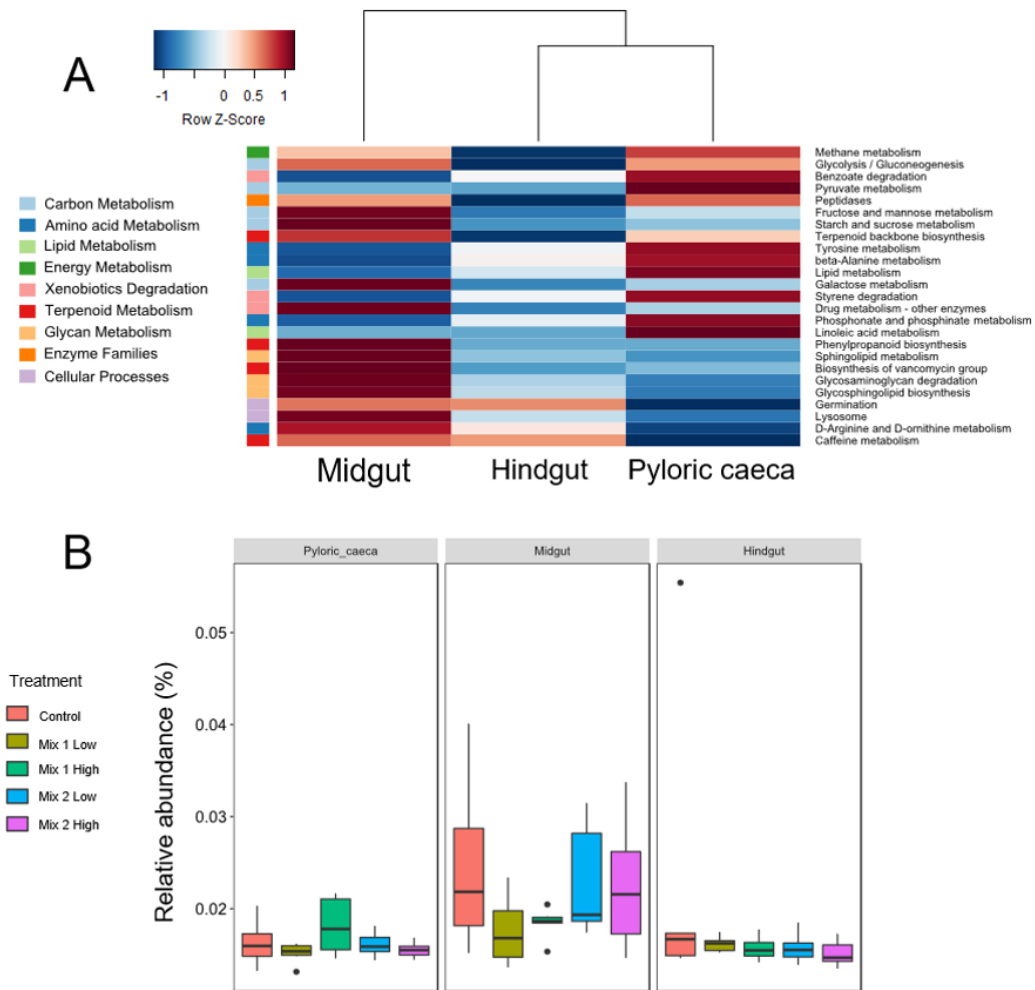

**Supplementary Figure 8. A.** Pathway enrichment analysis using PICRUSt-predicted KEGG (Kyoto Encyclopedia of Genes and Genomes) orthologs between the gut parts. Different pathways enrichment was indicated by the LefSe analysis. **B.** Relative abundance of genes in the biosynthesis of vancomycin group pathway across the gut parts and antibiotic-treated groups.

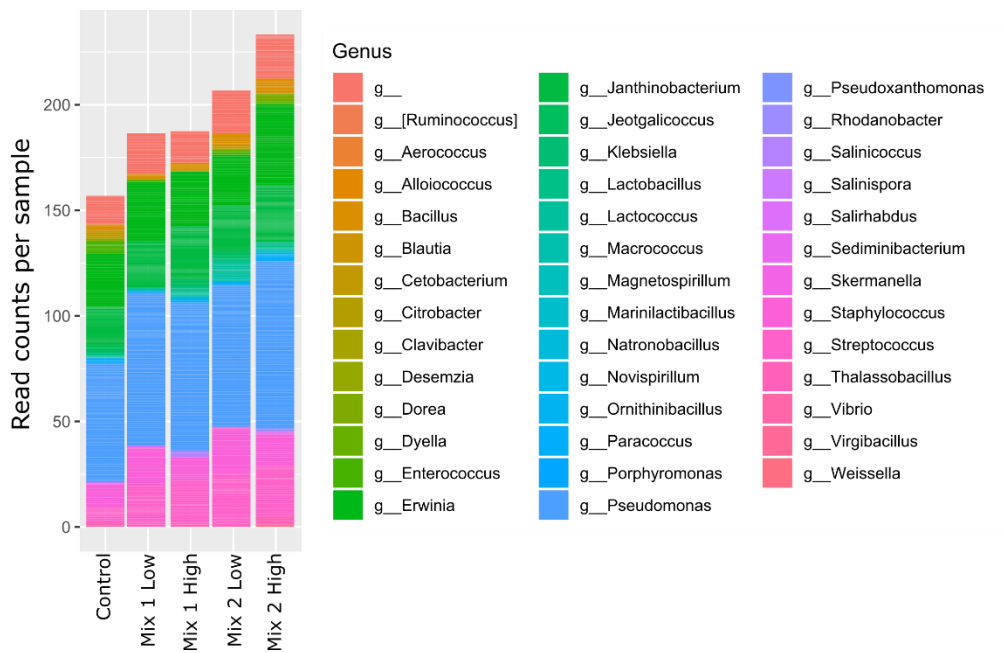

**Supplementary Figure 9.** Taxa contributing to enrichment of beta-lactam resistance, based on PICRUSt analysis. The taxa are presented at the genus level, showing their average read count in the samples per treatment.



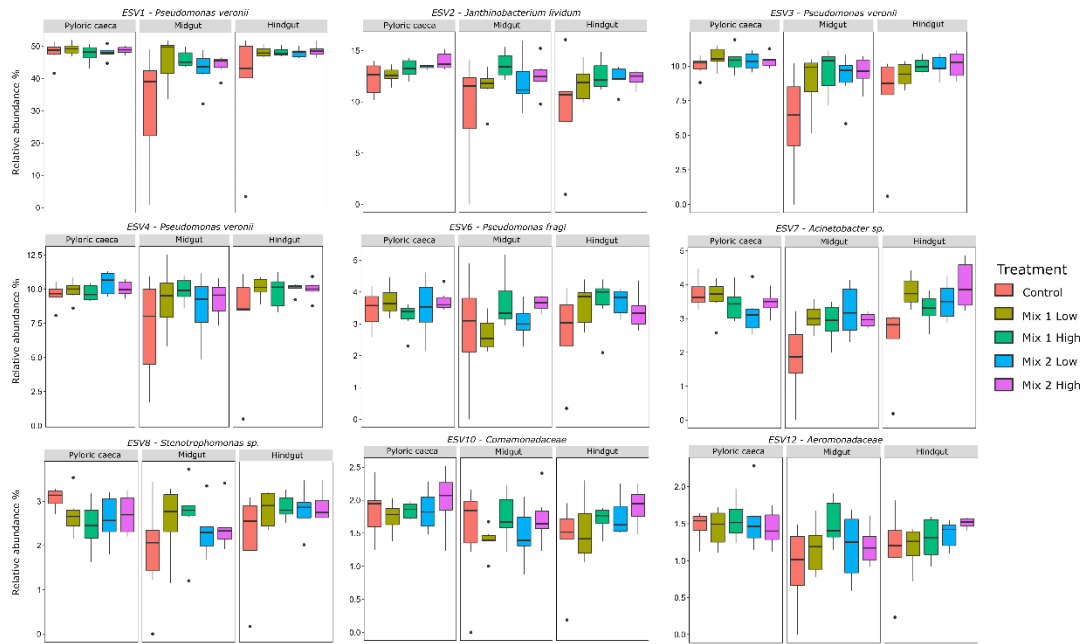

**Supplementary Figure 10.** Relative abundance of persistent taxa across parts and diets. On the Y-axis is shown the relative abundance in % and on the X-axis the different dietary groups.

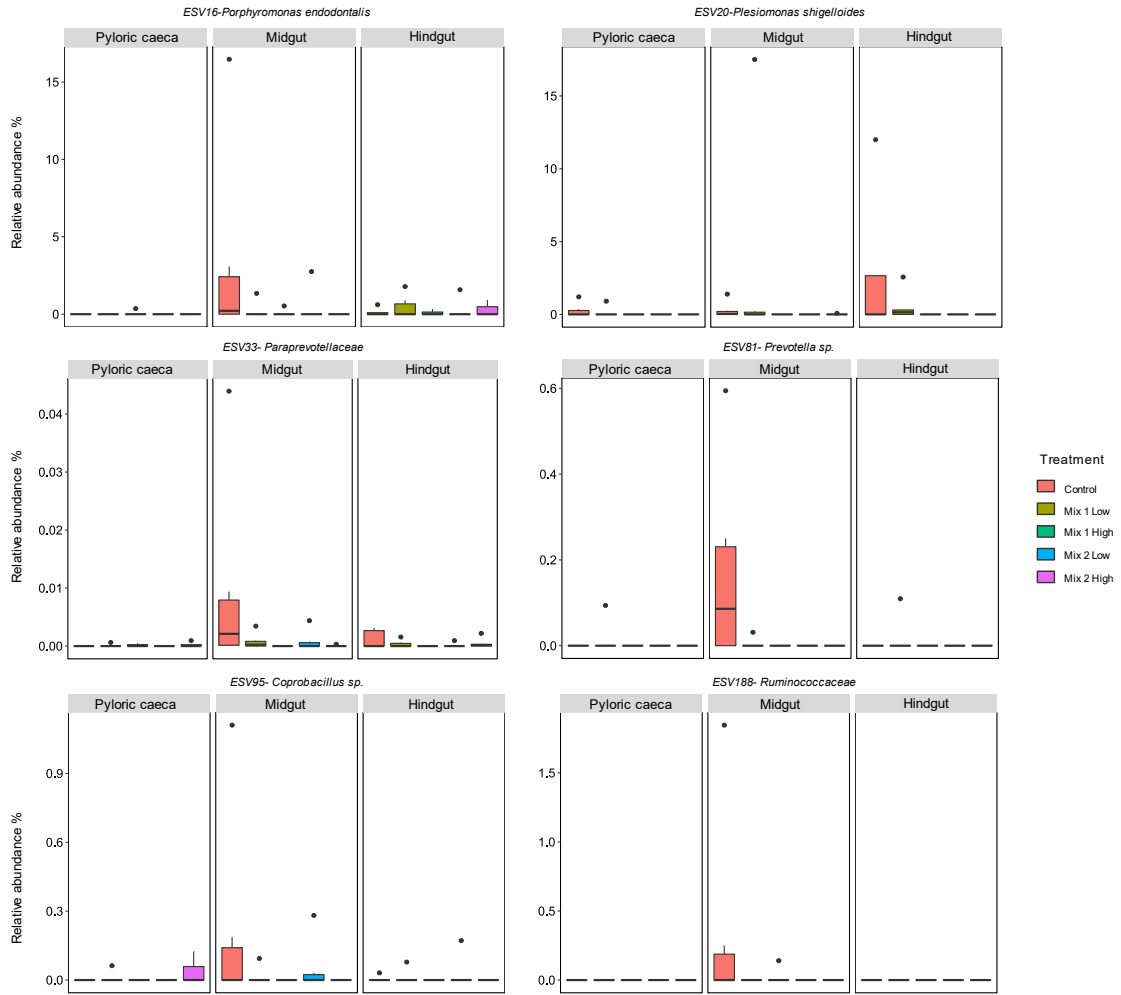

**Supplementary Figure 11.** Relative abundance of antibiotic-sensitive taxa across parts and diets. On the Y-axis is shown the relative abundance in % and on the X-axis the different dietary groups.

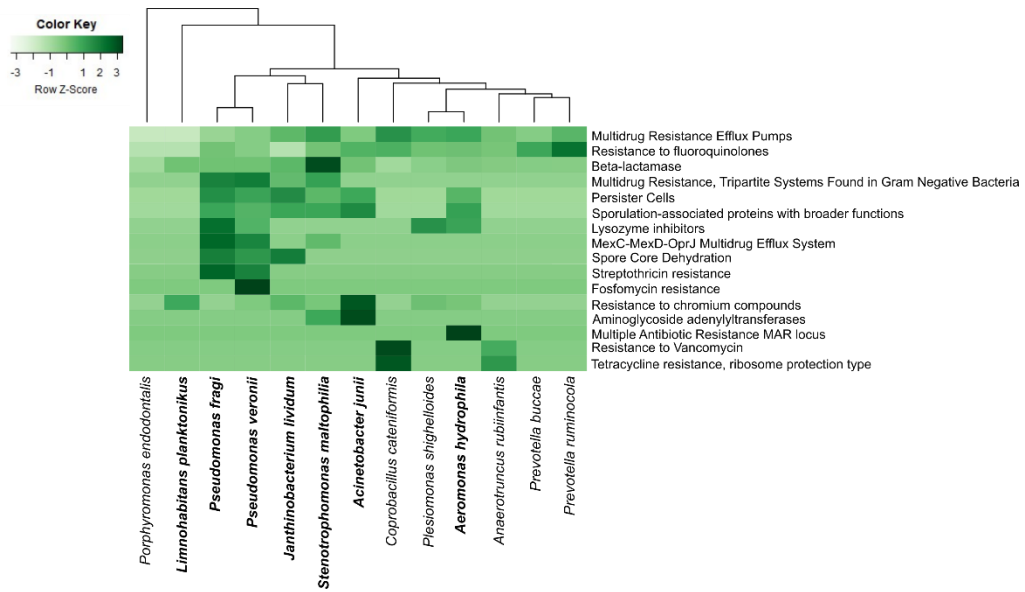

**Supplementary Figure 12.** Heatmap showing the antibiotic resistance gene abundance in the resilient (bold) and the antibiotic-affected microbes, showing that most of the persistent microbes cluster together. Antibiotic resistant genes were identified using the RAST server.
